# Supplementary material for: Noncovalent functionalization of Ti3C2TX using cationic porphyrins with enhanced stability against oxidation
Source: Royal Society of Chemistry journal article supplement (doi:10.1039/d1qm01326b), 2021-11-19
Supplement: d1qm01326b1.pdf [file d1qm01326b1.pdf]

**Noncovalent functionalization of  $\text{Ti}_3\text{C}_2\text{T}_x$  using cationic porphyrins with enhanced stability against oxidation**

*Shameel Thurakkal and Xiaoyan Zhang\**

Dr. Shameel Thurakkal, Prof. Xiaoyan Zhang

Division of Chemistry and Biochemistry, Department of Chemistry and Chemical Engineering, Chalmers University of Technology, Kemigården 4, SE-412 96 Göteborg, Sweden

E-mail: [xiaoyan.zhang@chalmers.se](mailto:xiaoyan.zhang@chalmers.se)

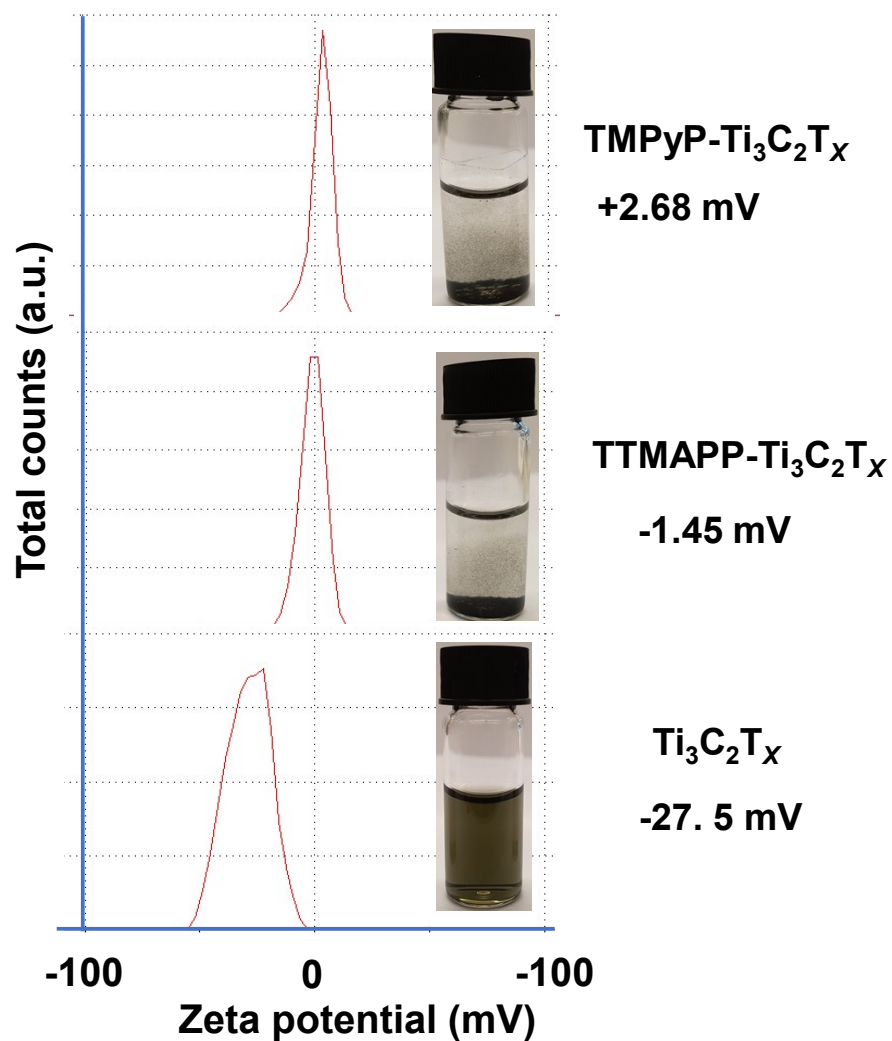

**Fig. S1.** Zetapotential and dispersions (inset images) of the  $\text{Ti}_3\text{C}_2\text{T}_x$ ,  $\text{TMPyP-Ti}_3\text{C}_2\text{T}_x$  and  $\text{TTMAPP-Ti}_3\text{C}_2\text{T}_x$  in water. The zetapotential measurements for the two hybrids were carried out by adding  $1 \mu\text{mol}$  of the porphyrins into  $10 \mu\text{g}$  of the  $\text{Ti}_3\text{C}_2\text{T}_x$  in water.

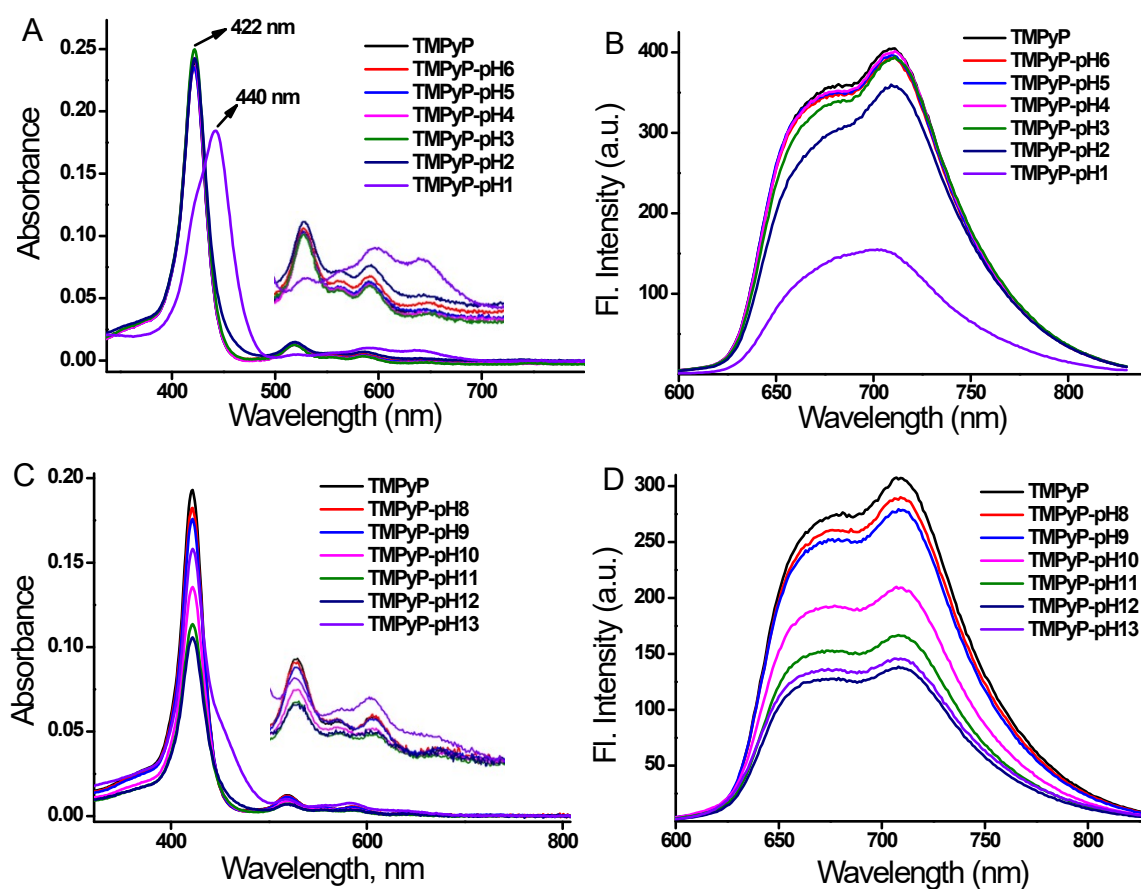

**Fig. S2.** UV-visible absorption and fluorescence emission spectra of 1  $\mu\text{M}$  of the TMPyP under acidic (A and B) and basic (C and D) conditions in water, respectively. The inset images (A and C) show the enlarged Q bands of the TMPyP under acidic and basic conditions.

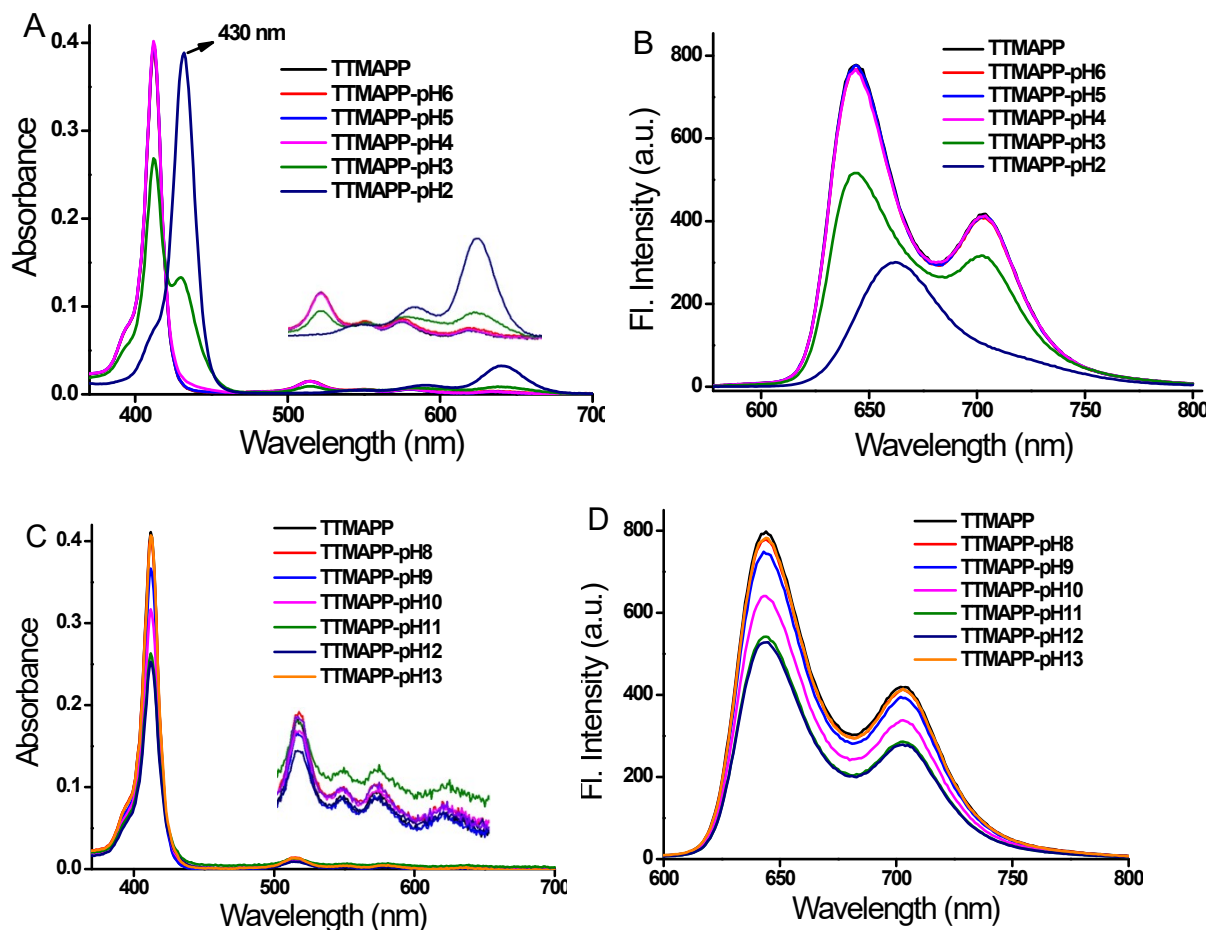

**Fig. S3.** UV-visible absorption and fluorescence emission spectra of 1  $\mu\text{M}$  of the TTMAPP under acidic (A and B) and basic (C and D) conditions in water. The inset images (A and C) show the enlarged Q bands of the TTMAPP under acidic and basic conditions.

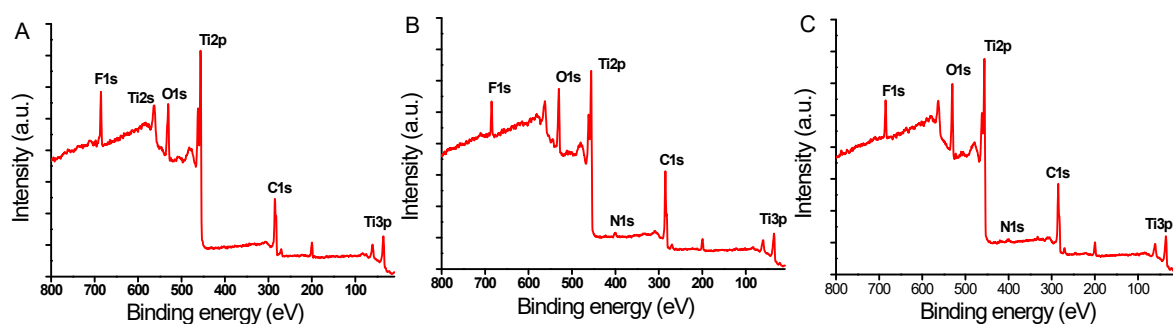

**Fig. S4.** XPS survey spectra of the  $\text{Ti}_3\text{C}_2\text{T}_x$  (A), TMPyP-  $\text{Ti}_3\text{C}_2\text{T}_x$  (B) and TTMAPP-  $\text{Ti}_3\text{C}_2\text{T}_x$  (C).

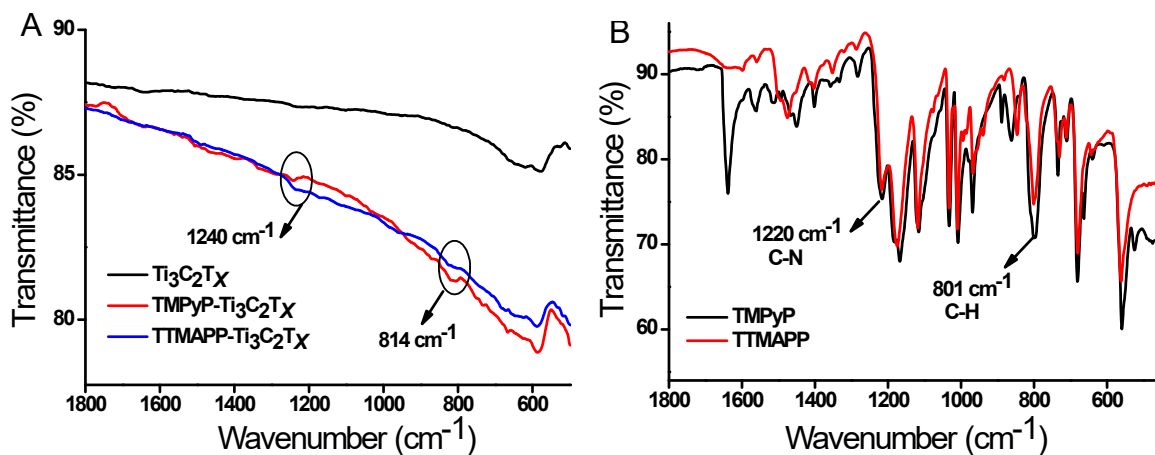

**Fig. S5.** IR spectra of the  $\text{Ti}_3\text{C}_2\text{T}_x$ ,  $\text{TMPyP-Ti}_3\text{C}_2\text{T}_x$  and  $\text{TTMAPP-Ti}_3\text{C}_2\text{T}_x$  (A) and  $\text{TMPyP}$  and  $\text{TTMAPP}$  (B).

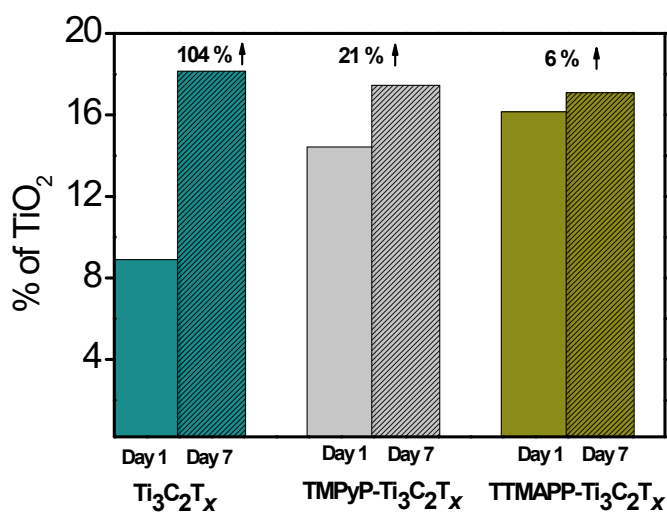

**Fig. S6.** Comparison of the area (in %) of the  $\text{TiO}_2$  peak obtained from the high resolution  $\text{Ti}2p$  XPS spectra of the  $\text{Ti}_3\text{C}_2\text{T}_x$ ,  $\text{TMPyP-Ti}_3\text{C}_2\text{T}_x$  and  $\text{TTMAPP-Ti}_3\text{C}_2\text{T}_x$  before and after storing them in undeoxygenated water for one week.

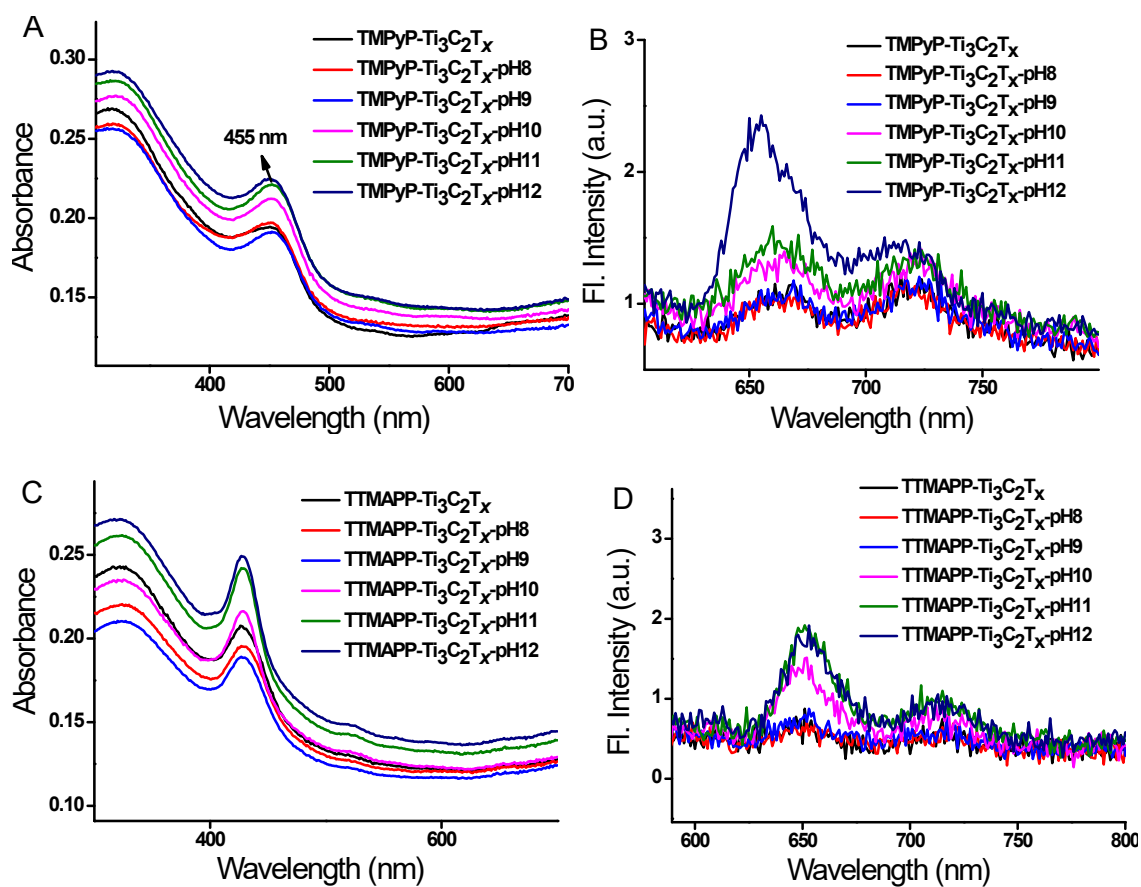

**Fig. S7.** UV-visible absorption and fluorescence emission spectra of the TMPyP-Ti<sub>3</sub>C<sub>2</sub>T<sub>x</sub> (A and B), TTMAPP-Ti<sub>3</sub>C<sub>2</sub>T<sub>x</sub> (C and D), respectively, under basic conditions in water.
